# Supplementary material
Source: Springer Nature journal article supplement (https://www.springermedizin.de/resource/supplementary/12874_2010_537_MOESM5_ESM.pdf/9432418)

## Analysis 01.01. Comparison 01 Early treatment at the end of Phase I: functional versus control, Outcome 01 Final overjet

Review: Orthodontic treatment for prominent upper front teeth in children

Comparison: 01 Early treatment at the end of Phase I: functional versus control

Outcome: 01 Final overjet

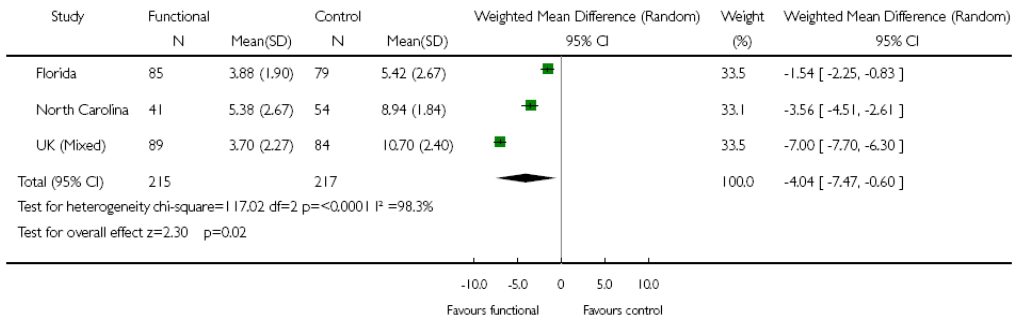

Supplement: MOESM5 [file 9432418]
